# Supplementary material
Source: PubMed Central journal article supplement (PMC3494747)
Supplement: NIHMS409376-supplement-01.pdf [file NIHMS409376-supplement-01.pdf]

392 **Supplemental Table 1** Differences in amino acid residues (highlighted by shading) from  
 393 murine  $\beta$ 2M at conserved points of contact with class I heavy chain domains<sup>†</sup>

| Residue | $\alpha$ 1/ $\alpha$ 2 |       |     | $\alpha$ 3 |       |     |
|---------|------------------------|-------|-----|------------|-------|-----|
|         | Human                  | Mouse | Dog | Human      | Mouse | Dog |
| 1       | I                      | I     | V   |            |       |     |
| 8       |                        |       |     | Q          | Q     | Q   |
| 10      |                        |       |     | Y          | Y     | Y   |
| 11      |                        |       |     | S          | S     | S   |
| 12      |                        |       |     | R          | R     | R   |
| 24      |                        |       |     | N          | N     | N   |
| 28      |                        |       |     | S          | T     | S   |
| 31      | H                      | H     | H   |            |       |     |
| 34      | D                      | H     | E   |            |       |     |
| 53*     | D                      | D     | D   |            |       |     |
| 54      | L                      | M     | L   |            |       |     |
| 60      | W                      | W     | W   |            |       |     |

394  
 395 <sup>†</sup>Conserved murine/human sites (residues 1-66) are from Trymbulak and Zeff (1997).  
 396 Alignment was performed with ClustalW (<http://www.ebi.ac.uk/Tools/msa/clustalw2/>)  
 397 using the following GenBank data: murine  $\beta$ 2M, accession no. AAH85164.1, human  
 398  $\beta$ 2M, accession no. AAA51811.1; canine  $\beta$ 2M, accession no. JQ733515.  
 399 \*For clarity, numbering is based on a putative gap at residue 44 in the predicted canine  
 400 protein sequence.
